# Supplementary material for: A novel blue emitting phosphor Ca1−ySryScBO4:Bi3+ with zero-thermal quenching for multi-scenario application
Source: Royal Society of Chemistry journal article supplement (doi:10.1039/d3dt03734g), 2024-01-01
Supplement: d3dt03734g1.pdf [file d3dt03734g1.pdf]

### Supporting information

**TableS1** Refinement parameters of  $\text{CaScBO}_4:0.007\text{Bi}^{3+}$  acquired from the Rietveld refinement using X-ray powder diffraction data at room temperature

| Sample                       | $x=0.007$    | $x=0.008$ | $x=0.009$ | $x=0.01$ | $x=0.02$ |
|------------------------------|--------------|-----------|-----------|----------|----------|
| Unit cell (Å)                |              |           |           |          |          |
| a                            | 10.22181     | 10.21711  | 10.21392  | 10.22621 | 10.24183 |
| b                            | 3.36331      | 3.36347   | 3.36353   | 3.36576  | 3.37033  |
| c                            | 9.40837      | 9.40888   | 9.40984   | 9.41662  | 9.43076  |
| Cell volume (Å) <sup>3</sup> | 323.451      | 323.335   | 323.273   | 324.111  | 325.535  |
| Space group                  | Pnma (No.62) |           |           |          |          |
| Crystal system               | orthorhombic |           |           |          |          |
| $R_{\text{wp}}(\%)$          | 7.821%       | 8.53%     | 8.094%    | 8.85%    | 7.787%   |
| $\chi^2$                     | 2.82         | 3.23      | 2.79      | 2.92     | 2.7      |

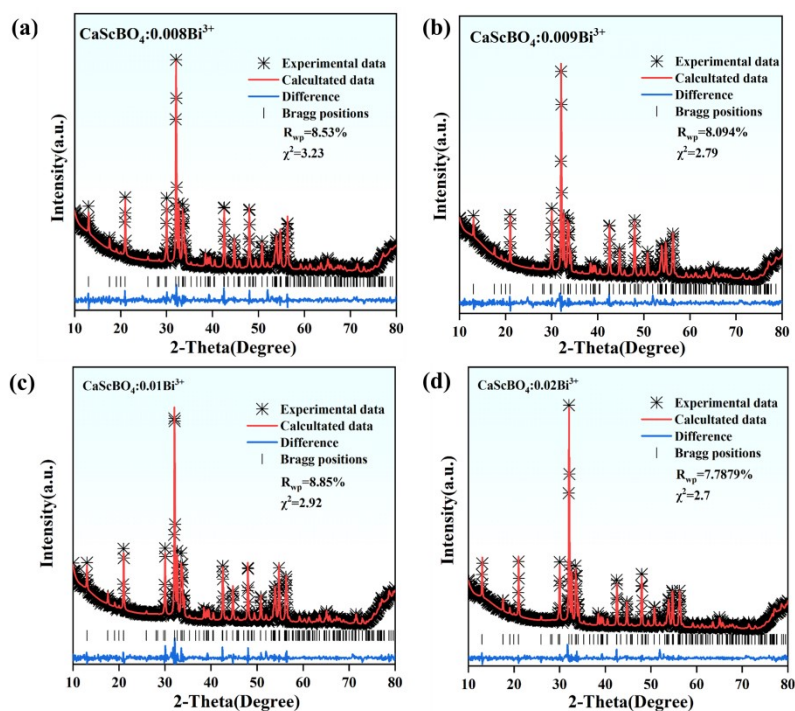

**Figure S1** (a-d) Refinement diagram of  $\text{CSBO}:x\text{Bi}^{3+}$  (0.008-0.02)

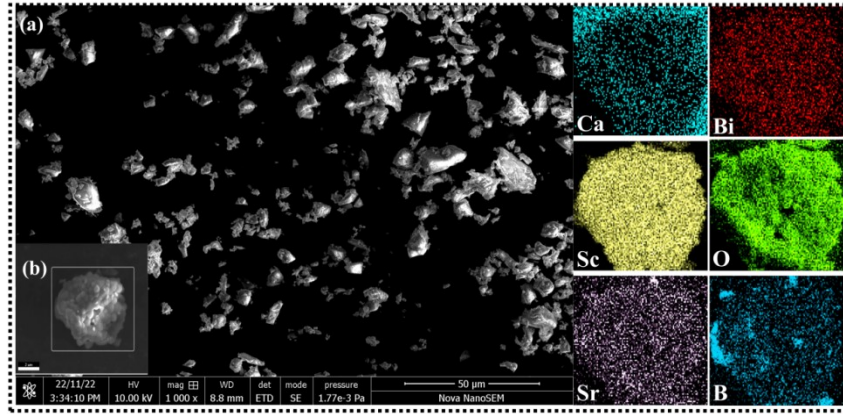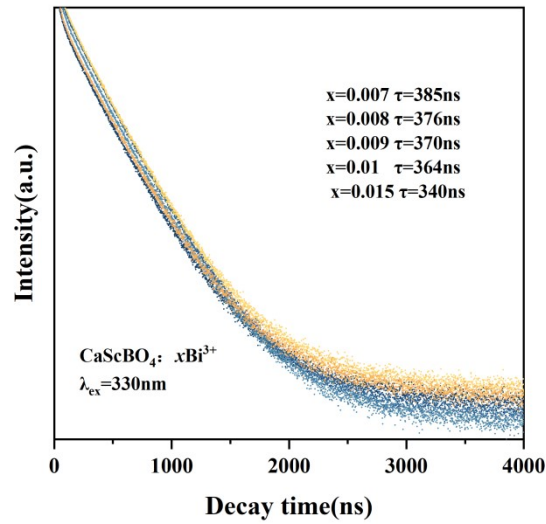

Figure S3 The PL decay curves of CSBO:xBi<sup>3+</sup> ( $x=0.007-0.015$ ) ( $\lambda_{ex}=330\text{nm}$ ;  $\lambda_{em}=430\text{nm}$ ).

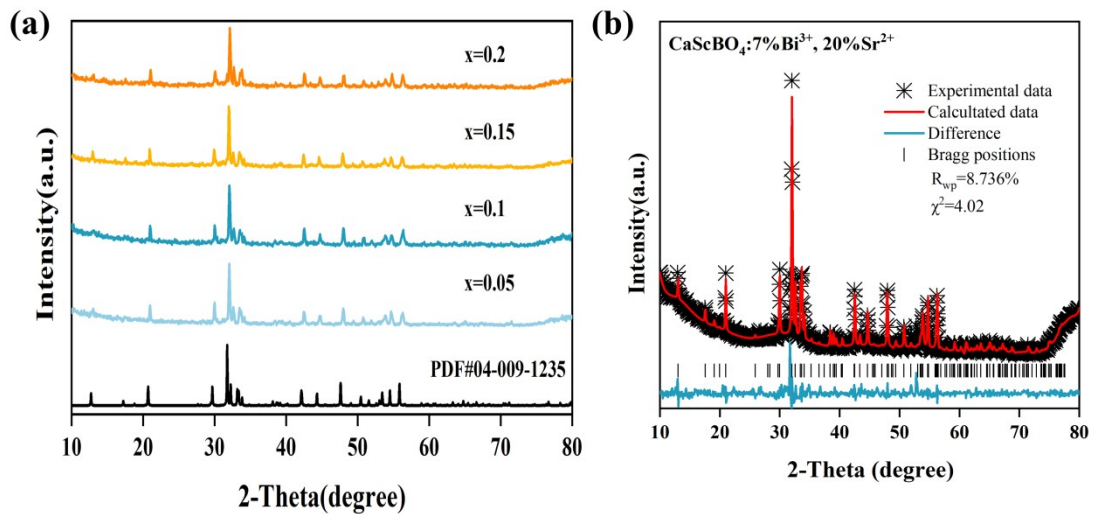

Figure S4 (a) XRD patterns of Ca<sub>0.993-y</sub>Sr<sub>y</sub>ScBO<sub>4</sub>:0.007Bi<sup>3+</sup> ( $y=0.05-0.2$ ); (b) Refinement diagram of Ca<sub>0.793</sub>Sr<sub>0.2</sub>ScBO<sub>4</sub>:0.007Bi<sup>3+</sup>.
